# Supplementary material for: Facile Preparation of SrZr<sub>1-x</sub>Ti<sub>x</sub>O<sub>3</sub> and SrTi<sub>1-x</sub>Zr<sub>x</sub>O<sub>3</sub> Fine Particles Assisted by Dehydration of Zr<sup>4+</sup> and Ti<sup>4+</sup> Gels under Hydrothermal Conditions
Source: Preprints.org preprint supplement (doi:10.20944/preprints202307.0412.v1), 2023-07-06
Supplement: Supplementary file 1 [file supplementary]

**Supplementary Supporting Information**

**Facile preparation of SrZr1-xTixO3 and SrTi1-xZrxO3 fine particles assisted by dehydration of Zr4+ and Ti4+ gels under hydrothermal conditions**

**J. R. Quiñones-Gurrola1, J. C. Rendón-Angeles1*, Z. Matamoros-Veloza2, J. López-Cuevas1, R. Pérez-Garibay1, K. Yanagisawa3**

*1 Centre for Research and Advanced Studies of the National Polytechnic Institute, Saltillo Campus, Ramos Arizpe, 25900, Coahuila, México; jose.quinones@cinvestav.edu.mx; jcarlos.rendon@cinvestav.edu.mx; jorge.lopez@cinvestav.edu.mx, roberto.perez@cinvestav.edu.mx*

*2 Tecnológico Nacional de México (I.T. Saltillo), Technological Institute of Saltillo, Graduate Division, Saltillo 25280, México; zully.mv2@saltillo.tnm.mx.*

*3 Research Laboratory of Hydrothermal Chemistry, Faculty of Science, Kochi University, Kochi 780-8073; Japan; yanagi@kochi-u.ac.jp*

** Correspondence: jcarlos.rendon@cinvestav.edu.mx (J.C.R.A.); Tel.: +52 (844) 438 9600*

This document contains supplementary data on the details of the Rietveld refinement. Likewise, the SEM micrographs corresponding to the particles of the solid solutions SrZr1-xTixO3 and SrTi1-xZrxO3 are included to address the analysis of morphology and crystallisation.

***S1. Rietveld Refinement information and XRD results***

The cards corresponding to the crystalline phases determined in the reaction products from the XRD patterns are shown in Tables S2–S6. These cards are from the COD 2014 database, which runs with the High Score Plus Panalityca software 3.0e. The designed algorithm program for structural refinement includes all crystallographic data listed in Tables S2–S6. The algorithm is based on a 10-coefficient shifted Chebyshev polynomial function that calculates the XRD pattern background, and the pseudo-Voigt function fits the peak shape profile. The algorithm calculates the unit lattice cell parameters, the isotropic thermal displacement, the crystallite size, and the by-product phase content. Typical plots obtained by the refinement algorithm that considers the reaction by-product phases are portrayed in Fig. S1.

**Table S1**. Strontium titanate cubic structure atomic coordinates associated with the *Pm3m*, 221, space group. These were used to carry out the Rietveld refinements by TOPAS 4.2 software; spatial locations were reported in the CIF file ICDD card no. 40-1500.

| **Element identification** | **Wyckoff position** | **Occupation** | **Spatial coordinates (SrTiO3)** | | |
| --- | --- | --- | --- | --- | --- |
| **x** | **y** | **z** |
| Sr | 4c | 1 | 0.5 | 0.5 | 0.5 |
| Zr | 4a | 1-X | 0.0 | 0.0 | 0.0 |
| Ti | 4a | X | 0.0 | 0.0 | 0.0 |
| O | 8c | 1 | 0.5 | 0.0 | 0.0 |

**Table S2**. Strontium zirconate orthorhombic structure atomic coordinates (space group *Pbnm*, 62) were used for Rietveld refinements by TOPAS 4.2 software; spatial locations were reported in CIF file ICDD card no. 70-0283.

| **Element identification** | **Wyckoff position** | **Occupation** | **Spatial coordinates (SrZrO3)** | | |
| --- | --- | --- | --- | --- | --- |
| **x** | **y** | **z** |
| Sr | 8d | 1 | 0.9916 | 0.0123 | 0.25 |
| Zr | 4c | 1-X | 0.5 | 0.0 | 0.0 |
| Ti | 4c | X | 0.5 | 0.0 | 0.0 |
| O1 | 4b | 1 | 0.0586 | 0.4687 | 0.25 |
| O2 | 4a | 1 | 0.713 | 0.288 | 0.0371 |

Plots calculated from the structural Rietveld refinement analyses:

**
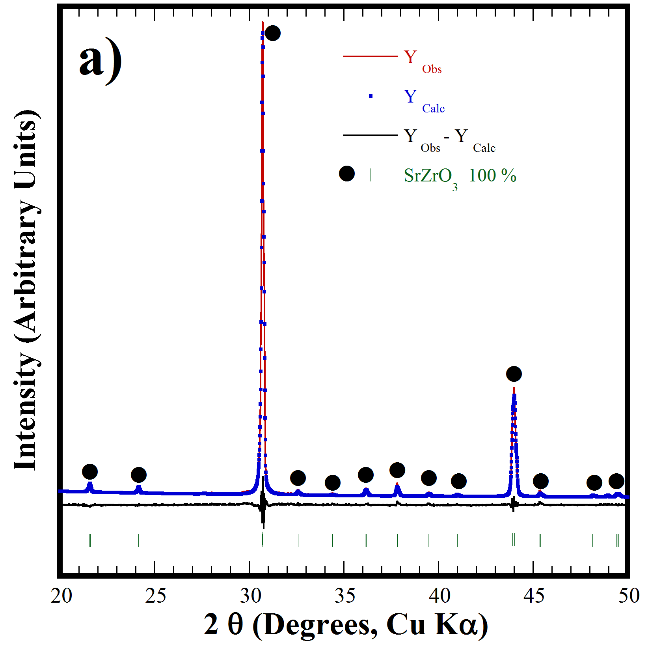

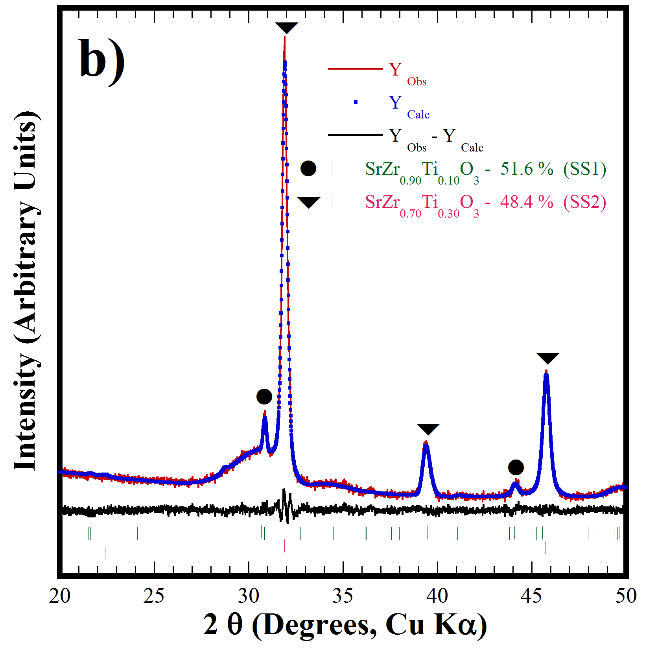

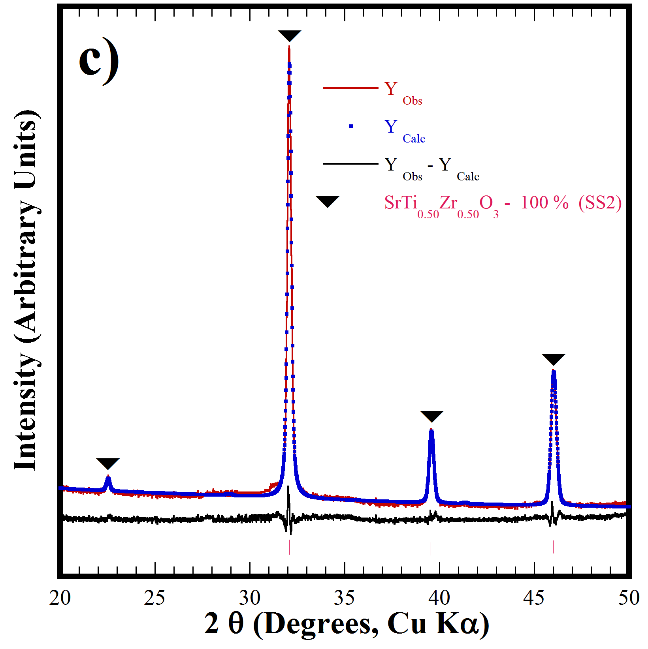

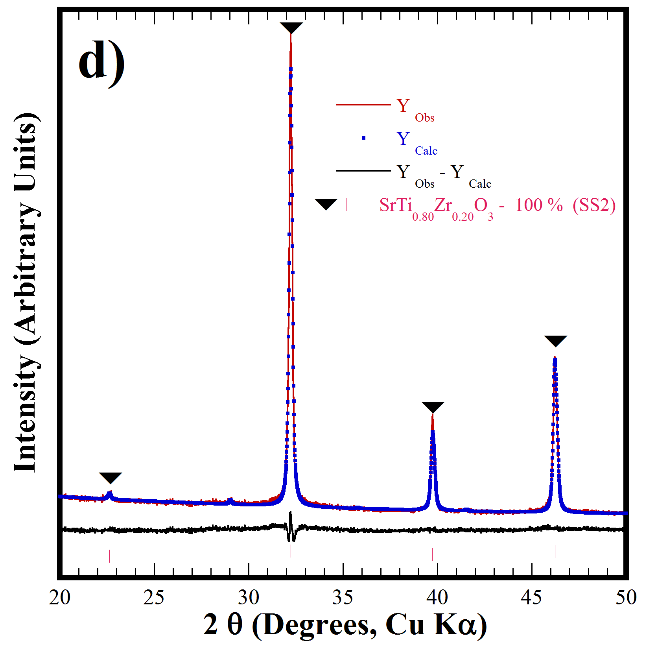

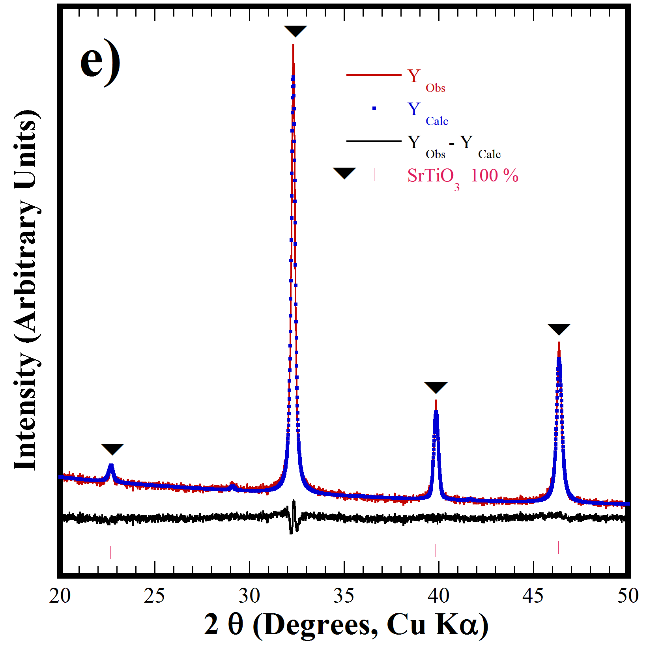
**

**Fig. S1.** Selected Rietveld refinement plots of powder samples prepared at 200 ºC for 4 h with 5 M KOH stirred at 130 rpm, using different Ti4+-gel contents of a) 0.0, b) 30.0, c) 50.0, d) 80.0 and e) 100.0 mol% Ti, respectively.

***S2. Chemical equilibrium promoted in alkaline hydrothermal conditions for synthesising solid solutions particles in the binary system SrZrO3–SrTiO3.***

Chemical equilibrium proposed from the PXRD analyses conducted on powdered specimens produced varying the Ti4+-gel precursor content; these equilibria trigger the formation of nanosized particles under alkaline hydrothermal conditions with continuous fluid stirring at 130 rpm. The sub-index abbreviations in the chemical equilibria, “*ort*” and “*cub*”, correspond to orthorhombic and cubic crystalline structures, and “*mc*” to meso-crystals.

SrSO4*(s)* + (1-x) Zr(OH)4-*(aq* + x Ti(OH)4-*(aq)* + 5KOH*(aq)*

" SrZr1-xTixO3*(mc,ort)* + K2SO4*(aq)* + 3KOH*(l)* + 3H2O (1)

SrSO4*(s)* + (1-[x+y]) Zr(OH)4-*(aq)* + (1-[x+y]) Ti(OH)4-*(aq)* + 5KOH*(aq)*

" [1-a] SrZr1-xTixO3*(mc,ort)* + [a] SrZr1-yTiyO3*(mc,cub)* + K2SO4*(aq)* + 3KOH*(l)* + 3H2O (2)

SrSO4*(pow)* + x Zr(OH)4-*(aq)* + (1-x) Ti(OH)4-*(aq)* + 5KOH*(aq)*

" SrTi1-xZrxO3*(mc,cub)* + K2SO4*(aq)* + 3KOH*(l)* + 3H2O (3)

**Table S3** Summary of experiments conducted to prepare powders of SrZr1-xTixO3 andSrTi1-xZrxO3 under hydrothermal conditions at 200 ºC for 4 h.

| **Sample**  **ID** | **Ti / Zr**  **% at** | **Crystalline**  **Phases**  **produced** | **Crystalline structure** | **Crystalline phases %** | **Lattice parameters** | | | **Crystallite**  **size**  **(nm)** | **Cell**  **Volume**  **(Å3)** | **Bond length (Å)** | | | ***Rwp* (%)** | **GoF (c2)** |
| --- | --- | --- | --- | --- | --- | --- | --- | --- | --- | --- | --- | --- | --- | --- |
| **a (Å)a** | **b (Å)a** | **c (Å)a** | **Sr-O** | **Ti-O** | **Zr-O** |
| SZG22R | 100 | SrZrO3 | *Pbnm* | 100 | 5.8200 (1) | 5.8207 (1) | 8.2293 (2) | 100.83 (5) | 278.78 (12) | 2.161 (3) | - | 2.024 (3) | 6.06 | 5.164 |
| SZG46R | 5 /100 | SrZr0.95Ti0.05O3 | *Pbnm* | 100 | 5.8191 (1) | 5.8120 (2) | 8.2314 (3) | 115.37 (7) | 278.39 (17) | 1.819 (1) | 2.209 (1) | 2.209 (1) | 4.71 | 4.19 |
| SZG47R | 7.5 / 92.5 | SrZr0.925Ti0.075O3 | *Pm3m* | 8.56 | 3.9889 (5) | - | - | 66.67 (21) | 63.59 (2) | 2.820 (1) | 1.994 (1) | 1.994 (1) | 3.04 | 2.95 |
| SrZr0.93Ti0.07O3 | *Pbnm* | 91.44 | 5.8262 (7) | 5.8147 (2) | 8.2184 (4) | 254.46 (15) | 278.42 (3) | 2.541 (1) | 2.061 (1) | 2.061 (1) |
| SZG37R | 10 / 90 | SrZr0.90Ti0.10O3 | *Pm3m* | 14.86 | 3.9916 (9) | - | - | 28.89 (11) | 63.47(9) | 2.822 (2) | 1.995 (2) | 1.995 (2) | 3.38 | 3.19 |
| SrZr0.928Ti0.0702O3 | *Pbnm* | 85.14 | 5.8059 (13) | 5.8036 (14) | 8.2192 (14) | 103.49 (24) | 278.38 (12) | 2.353 (2) | 2.035 (2) | 2.035 (2) |
| SZG48R | 12.5 / 87.5 | SrZr0.875Ti0.125O3 | *Pm3m* | 15.76 | 3.9773 (3) | - | - | 60.64 (22) | 62.92 (1) | 2.812 (1) | 1.988 (1) | 1.988 (1) | 2.90 | 3.02 |
| SrZr0.925Ti0.075O3 | *Pbnm* | 84.21 | 5.8025 (8) | 5.8272 (8) | 8.2195 (6) | 208.56 (21) | 277.92 (6) | 2.207 (1) | 1.999 (1) | 1.999 (1) |
| SZG49R | 15 / 85 | SrZr0.85Ti0.15O3 | *Pm3m* | 19.4 | 3.9683 (4) | - | - | 17.01 (2) | 62.49 (2) | 2.806 (3) | 1.984 (3) | 1.984 (3) | 2.84 | 3.01 |
| SrZr0.92Ti0.08O3 | *Pbnm* | 80.6 | 5.8135 (5) | 5.8092 (5) | 8.2152 (5) | 38.13 (5) | 277.44 (4) | 1.942 (3) | 2.061 (3) | 2.061 (3) |
| SZG50R | 17.5 / 82.5 | SrZr0.825Ti0.175O3 | *Pm3m* | 20.14 | 3.9653 (4) | - | - | 122.95 (26) | 62.34 (2) | 2.803 (1) | 1.982 (1) | 1.982 (1) | 2.92 | 3.12 |
| SrZr0.918Ti0.082O3 | *Pbnm* | 79.86 | 5.7903 (19) | 5.8154 (14) | 8.2161 (14) | 244.77 (25) | 277.00 (12) | 2.109 (1) | 2.069 (1) | 2.069 (1) |
| SZG51R | 20 / 80 | SrZr0.80Ti0.20O3 | *Pm3m* | 21.27 | 3.9653 (2) | - | - | 47.69 (12) | 62.35 (1) | 2.803 (2) | 1.982 (2) | 1.982 (2) | 2.71 | 2.93 |
| SrZr0.915Ti0.085O3 | *Pbnm* | 78.73 | 5.8034 (5) | 5.8151 (5) | 8.2151 (5) | 85.89 (19) | 277.24 (4) | 2.315 (2) | 2.105 (2) | 2.105 (2) |
| SZG52R | 22.5 / 77.5 | SrZr0.775Ti0.225O3 | *Pm3m* | 29.7 | 3.9612 (3) | - | - | 139.98 (14) | 62.15 (1) | 2.801 (3) | 1.980 (3) | 1.980 (3) | 2.95 | 2.98 |
| SrZr0.911Ti0.089O3 | *Pbnm* | 70.3 | 5.7905 (16) | 5.8374 (8) | 8.2068 (8) | 247.27 (14) | 277.40 (12) | 2.474 (3) | 2.075 (3) | 2.075 (3) |
| SZG54R | 25 / 75 | SrZr0.75Ti0.25O3 | *Pm3m* | 34.28 | 3.9553 (9) | - | - | 200.86 (24) | 61.87 (4) | 2.796 (4) | 1.977 (4) | 1.977 (4) | 3.01 | 3.05 |
| SrZr0.91Ti0.09O3 | *Pbnm* | 65.72 | 5.7988 (15) | 5.8174 (17) | 8.2097 (17) | 231.73 (19) | 276.94 (12) | 1.896 (4) | 2.094 (4) | 2.094 (4) |
| SZG55R | 27.5 / 72.5 | SrZr0.725Ti0275O3 | *Pm3m* | 41.45 | 3.9510 (5) | - | - | 135.16 (50) | 61.67 (2) | 2.793 (1) | 1.975 (8) | 1.975 (8) | 3.07 | 3.13 |
| SrZr0.905Ti0.095O3 | *Pbnm* | 58.55 | 5.8042 (13) | 5.7925 (13) | 8.2082 (12) | 252.25 (22) | 276.21 (1) | 1.646 (1) | 2.148 (8) | 2.148 (8) |
| SZG39R | 30 / 70 | SrZr0.70Ti0.30O3 | *Pm3m* | 48.4 | 3.9649 (1) | - | - | 56.97 (8) | 61.63 (7) | 2.803 (6) | 1.982 (6) | 1.982 (6) | 3.61 | 3.20 |
| SrZr0.9Ti0.1O3 | *Pbnm* | 51.6 | 5.7150 (46) | 5.8608 (18) | 8.2125 (18) | 78.04 (14) | 276.07 (3) | 2.053 (6) | 2.060 (6) | 2.060 (6) |
| SZG57R | 32.5 / 67.5 | SrZr0.675Ti0.325O3 | *Pm3m* | 50.13 | 3.9492 (6) | - | - | 103.79 (24) | 61.59 (9) | 2.792 (2) | 1.974 (2) | 1.974 (2) | 3.19 | 3.24 |
| SrZr0.9Ti0.1O3 | *Pbnm* | 49.87 | 5.7687 (12) | 5.8315 (15) | 8.1967 (15) | 246.31 (22) | 275.74 (1) | 1.712 (2) | 2.123 (2) | 2.123 (2) |

**Table S3 continue.**

| **Sample ID** | **Ti / Zr**  **% at** | **Crystalline phases produced** | **Crystalline**  **structure** | **Crystalline**  **phases**  **%** | **Lattice parameters** | | | **Crystallite size (nm) Rietveld** | **Cell volume (Å3)** | **Bond length (Å)** | | | **Rwp (%)** | **GoF (c2)** |
| --- | --- | --- | --- | --- | --- | --- | --- | --- | --- | --- | --- | --- | --- | --- |
| **a (Å)a** | **b (Å)a** | **c (Å)a** | **Sr-O** | **Ti-O** | **Zr-O** |
| SZG58R | 35 / 65 | SrZr0.65Ti0.35O3 | *Pm3m* | 51.68 | 3.9466 (3) | - | - | 93.81 (26) | 61.47 (1) | 2.790 (4) | 1.973 (2) | 1.973 (2) | 3.12 | 3.16 |
| SrZr0.9Ti0.1O3 | *Pbnm* | 48.32 | 5.7537 (7) | 5.8267 (7) | 8.1942 (7) | 106.60 (85) | 274.89 (1) | 1.862 (4) | 2.164 (2) | 2.164 (2) |
| SZG59R | 37.5 / 62.5 | SrZr0.625Ti0.375O3 | *Pm3m* | 53.42 | 3.9433 (2) | - | - | 92.41 (17) | 61.32 (1) | 2.788 (4) | 1.971 (2) | 1.971 (2) | 2.98 | 3.03 |
| SrZr0.9Ti0.1O3 | *Pbnm* | 46.58 | 5.7451 (5) | 5.8138 (5) | 8.1991 (5) | 228.98 (27) | 273.86 (1) | 1.853 (4) | 2.167 (2) | 2.167 (2) |
| SZG60R | 40 / 60 | SrZr0.60Ti0.40O3 | *Pm3m* | 55.57 | 3.9384 (2) | - | - | 54.54 (6) | 61.09 (1) | 2.784 (4) | 1.969 (3) | 1.969 (3) | 3.23 | 3.29 |
| SrZr0.9Ti0.1O3 | *Pbnm* | 44.43 | 5.7445 (16) | 5.8264 (7) | 8.1958 (7) | 40.29 (12) | 273.39 (2) | 1.221 (4) | 1.779 (3) | 1.779 (3) |
| SZG61R | 42.5 / 57.5 | SrZr0.575Ti0.425O3 | *Pm3m* | 60.05 | 3.9417 (3) | - | - | 42.57 (3) | 61.24 (1) | 2.787 (7) | 1.970 (7) | 1.970 (7) | 3.26 | 3.59 |
| SrZr0.895Ti0.105O3 | *Pbnm* | 39.95 | 5.7436 (18) | 5.9838 (6) | 8.1893 (6) | 10.30 (1) | 272.67 (2) | 2.320 (7) | 1.876 (7) | 1.876 (7) |
| SZG62R | 45 / 55 | SrZr0.55Ti0.45O3 | *Pm3m* | 74.26 | 3.9356 (1) | - | - | 46.85 (3) | 60.95 (1) | 2.782 (4) | 1.967 (6) | 1.967 (6) | 5.75 | 4.45 |
| SrZr0.89Ti0.11O3 | *Pbnm* | 25.74 | 5.7435 (12) | 5.6016 (9) | 8.1882 (9) | 63.32 (2) | 272.26 (3) | 0.714 (4) | 0.668 (6) | 0.668 (6) |
| SZG63R | 47.5 / 52.5 | SrZr0.525Ti0.475O3 | *Pm3m* | 85.17 | 3.9354 (1) | - | - | 37.40 (4) | 60.95 (1) | 2.782 (3) | 1.967 (2) | 1.967 (2) | 4.04 | 3.80 |
| SrZr0.885Ti0.115O3 | *Pbnm* | 14.83 | 5.7433 (17) | 5.8841 (3) | 8.1066 (3) | 71.61 (65) | 271.91 (3) | 0.410 (3) | 0.720 (2) | 0.720 (2) |
| SZG36R | 50 / 50 | SrTi0.5Zr0.5O3 | *Pm3m* | 100 | 3.9439 (10) | - | - | 53.65 (2) | 60.86 (1) | 2.788 (1) | 1.971 (1) | 1.971 (1) | 5.46 | 4.55 |
| SZG35R | 60 / 40 | SrTi0.6Zr0.4O3 | *Pm3m* | 100 | 3.9368 (14) | - | - | 141.70 (9) | 60.81 (1) | 2.783 (1) | 1.968 (1) | 1.968 (1) | 4.93 | 3.97 |
| SZG34R | 70 / 30 | SrTi0.7Zr0.3O3 | *Pm3m* | 100 | 3.9296 (11) | - | - | 71.72 (2) | 60.68 (1) | 2.778 (1) | 1.964 (1) | 1.964 (1) | 4.73 | 3.67 |
| SZG33R | 80 / 20 | SrTi0.8Zr0.2O3 | *Pm3m* | 100 | 3.9254 (6) | - | - | 77.18 (1) | 60.48 (1) | 2.775 (1) | 1.962 (1) | 1.962 (1) | 4.68 | 3.51 |
| SZG32R | 90 / 10 | SrTi0.9Zr0.1O3 | *Pm3m* | 100 | 3.9218 (4) | - | - | 74.28 (1) | 60.32 (1) | 2.773 (1) | 1.960 (1) | 1.960 (1) | 4.90 | 3.59 |
| SZG66R | 100 | SrTiO3 | *Pm3m* | 100 | 3.9172 (12) | - | - | 85.22 (5) | 60.09 (1) | 2.769 (1) | 1.958 (1) | - | 4.04 | 3.25 |
| Strontium zirconate (SrZrO3) b *Pbnm* | | | |  | 5.786 | 5.815 | 8.196 |  | 275.75 |  |  |  |  |  |
| Strontium titanate (SrTiO3) c *Pm3m* | | | |  | 3.905 | - | - |  | 59.54 |  |  |  |  |  |

Note: *Pm3m* = Crystalline structure orthorhombic.

*Pbnm* = Crystalline structure cubic.

a The lattice parameters “a” were only determined for solid solution SrTi1-xZrxO3 and “a”, “b” and “c” were only determined for solid solution SrZr1-xTixO3; these values were calculated considering anisotropic lattice strain, particle size and preferential orientation as parameters for the Rietveld refinement analyses.

b Strontium zirconate structure ICDD card No. 70-0283.

c Strontium titanate structure ICDD card No. 40-1500.

***S3. Microstructural features of the SS particles prepared under alkaline hydrothermal conditions with vigorous fluid stirring***

Fig. S2 shows the morphology of particles obtained at 200 ºC for 4 h in a 5 M KOH solution with different Zr and Ti gels contents. Generally, the micrographs showed remarkable differences in the particle size of the fine mesocrystals produced over Ti4+ contents of 15 mol%. In all cases, the microstructural results indicated that secondary phases were not simultaneously produced during the crystallisation of the perovskite-structured orthorhombic (SS1) and cubic (SS2’ and SS2) mesocrystals. Furthermore, the mesocrystals morphology is irrespective of the crystalline phase formed (Figs. S3a–S3j); the particles exhibited a cubic habit which agrees with the morphological crystalline features of the mineral perovskite specie (CaTiO3). The agglomerated mesocrystals formed by tiny crystals corresponding to the new cubic-structured SS2’ phase rich in Zr4+ were visible on the FE SEM micrographs of powder samples prepared with Ti4+ contents over 20.0 mol% (Figs. S3d – S3h). These results are analogous to the SS1 and SS2’ amounts calculated by the refinement analyses in Table S3. Therefore, the SS2’ mesocrystals were difficult to determine on the samples prepared with low Ti4+ contents between 7.5 and 20.0 mol %. In addition, it deserves to emphasise that the SS2’ cubic-like shaped particles exhibit a particular surface rugosity, which is visible on the cuboidal-shaped mesocrystals {100} facets. This texture resulted from the tiny crystals' 3D hierarchical self-assembly process, forming the agglomerated SS2’ cubic perovskite mesocrystals. On the contrary, the orthorhombic structured SS1 mesocrystals exhibited flat and smooth crystal {100} facets.

Figure S3 shows the results of the chemical compositional analyses determined by the EDX microprobe. The area mode acquisition measurements were conducted on the selected particles, highlighted by the yellow square in each case; for samples prepared with different Ti4+ molar concentrations. Furthermore, the area mapping images and energy spectra of both SS1 and SS2’ particles are also portrayed in Figs 3a-3c. The differences revealed from these analyses agree with the stoichiometry contents of these crystalline phases used for the Rietveld refinement analyses in each case. In addition, the chemical compositional differences between the orthorhombic (SS1) and cubic (SS2’) structured particles were confirmed by the area mapping images and the EDX spectra given in Figs. 3a-3c. Hence, these results confirmed that under hydrothermal conditions with stirring triggered, the simultaneous crystallisation of the mixture of the phases abovementioned.


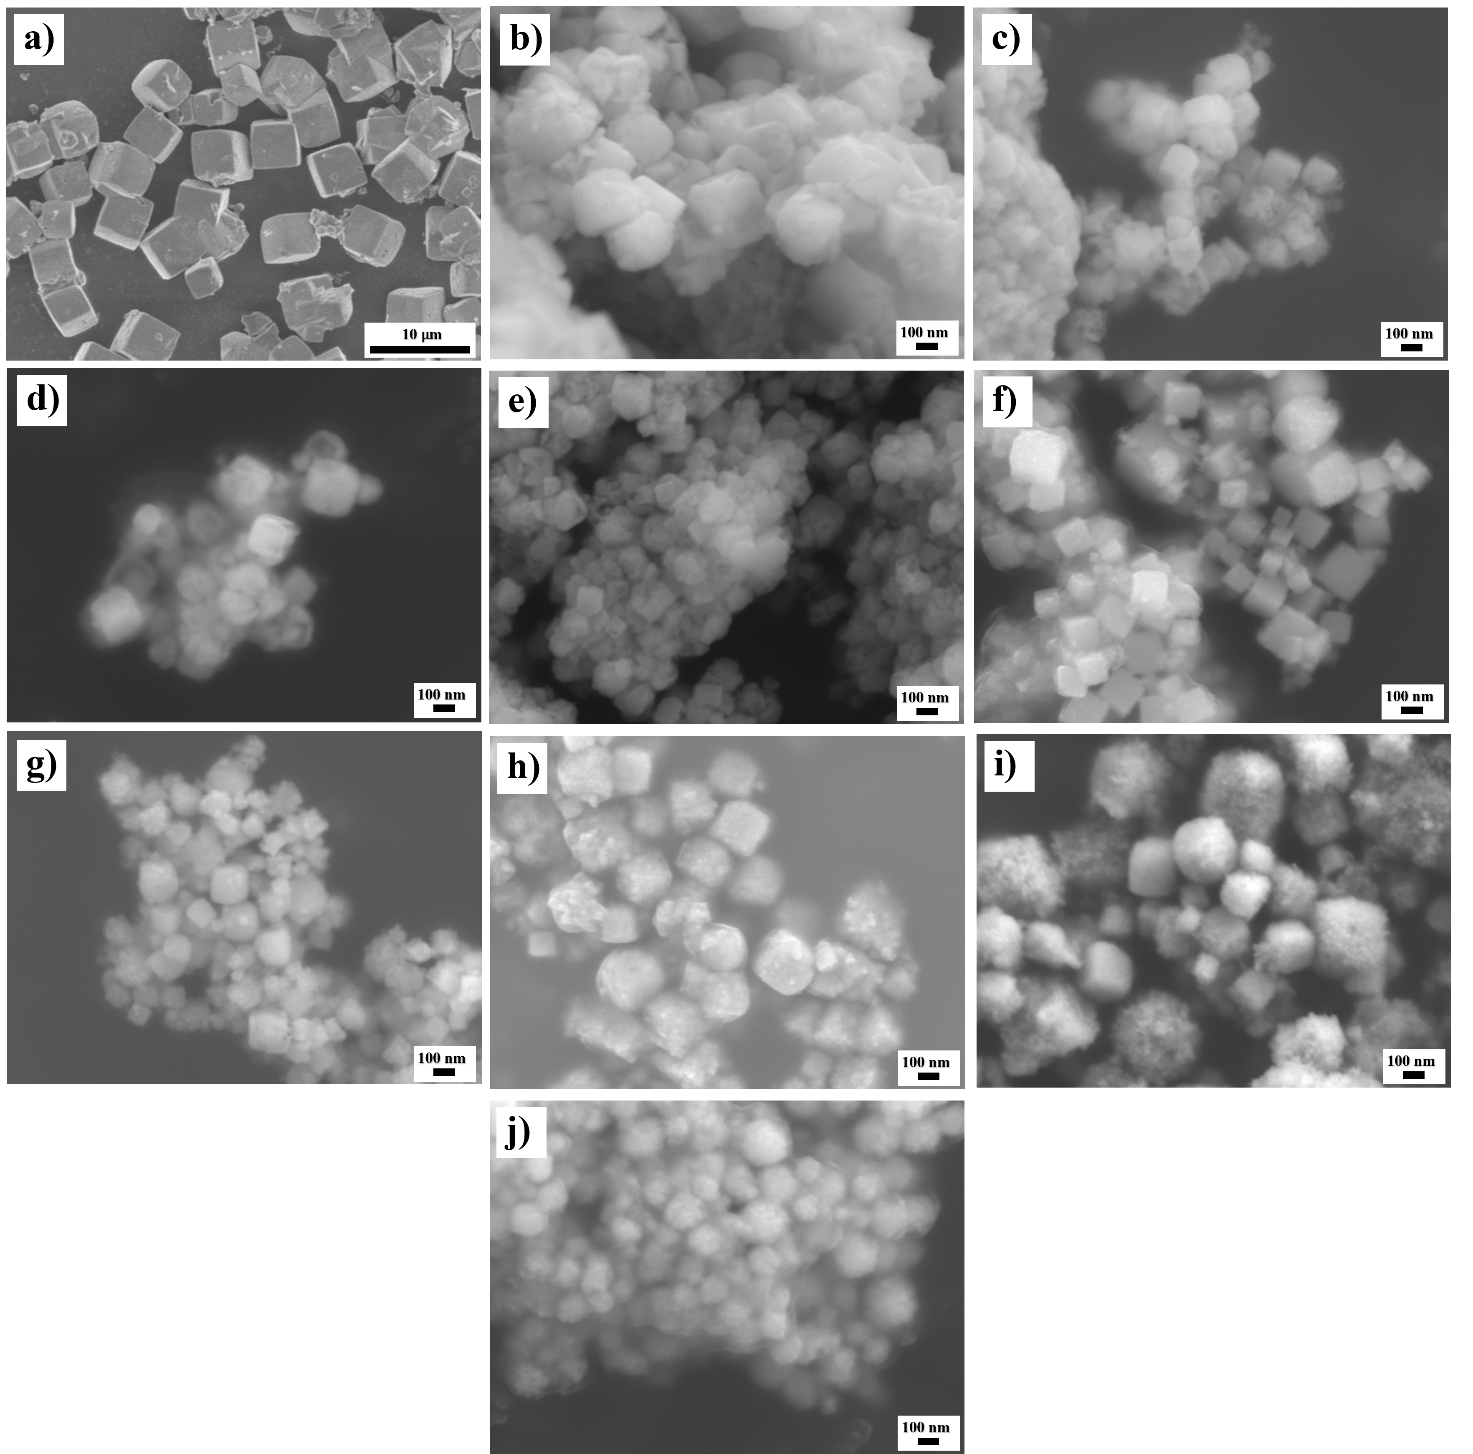


**Figure S2** FE-SEM micrographs of particles of the solid solutions SrZr1-xTixO3 and SrTi1-xZrxO3, obtained under hydrothermal conditions at 200 °C for 4 h, using a reaction medium of 5 M KOH and SrSO4 with different contents of Ti gel (Ti(OH)4•4.5H2O), a) 0.0, (b) 10.0, (c) 15.0, (d) 20.0, (e) 25.0, (f) 30.0, (g) 40.0, (h) 50.0, (i) 75.0 and (j) 100.0 %mol Ti4+.


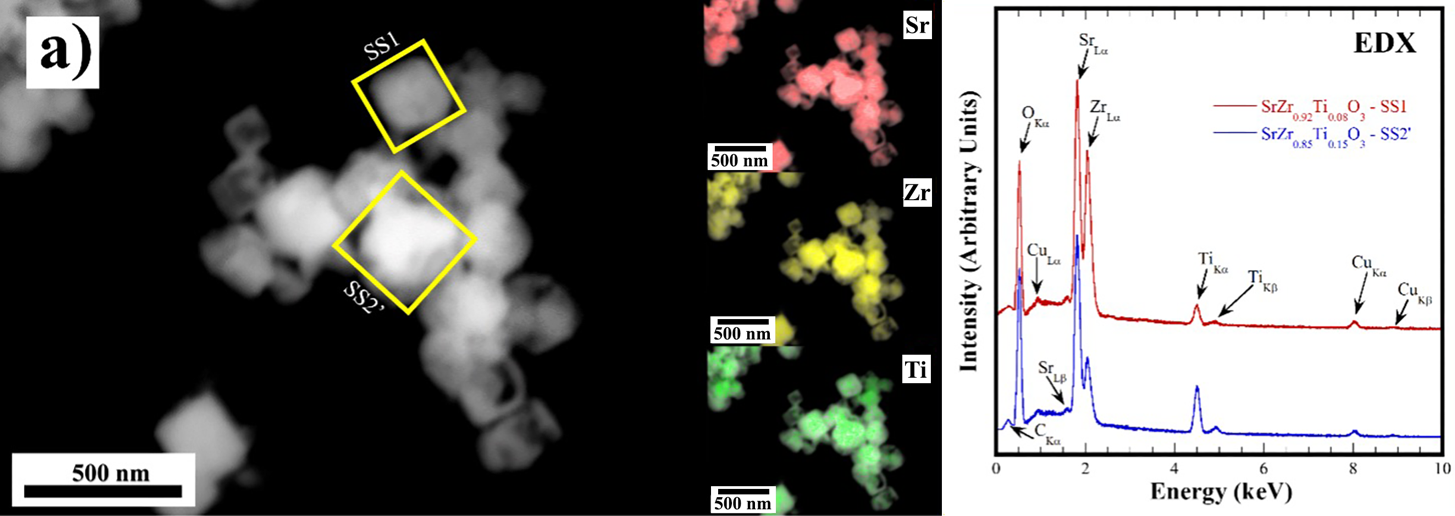


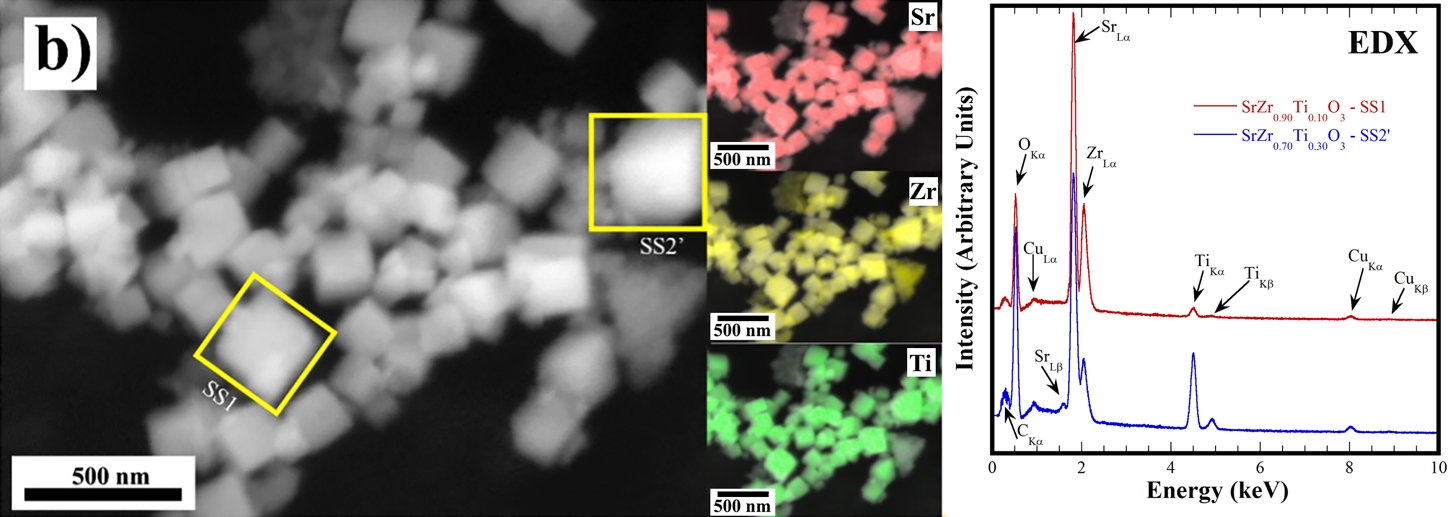


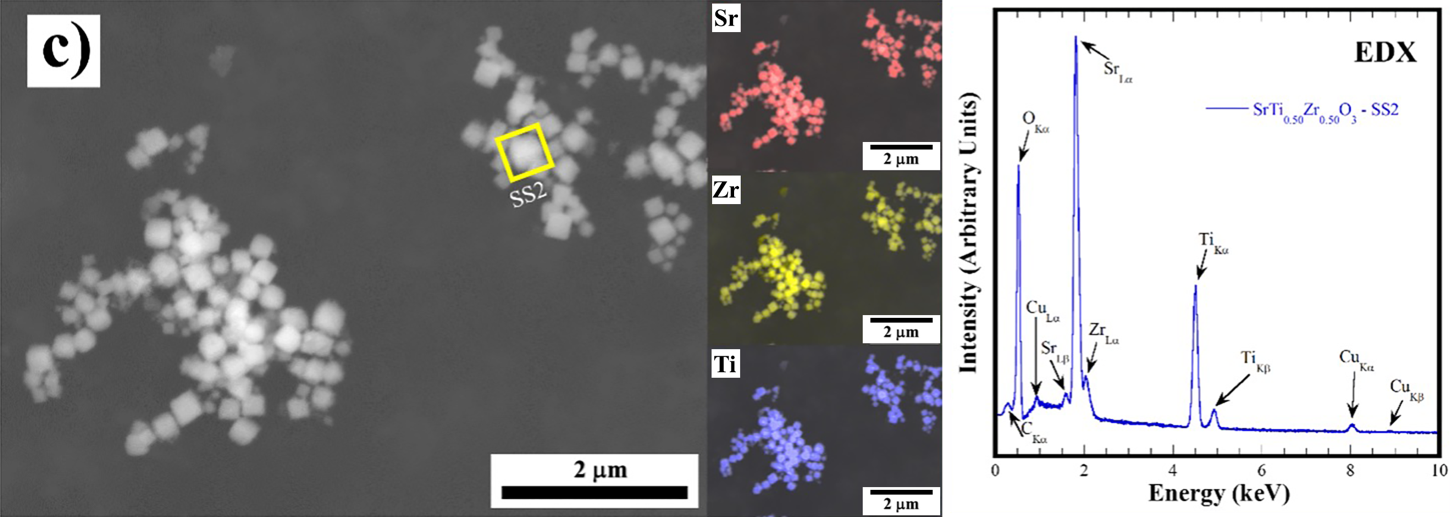


**Figure S3** FE-SEM images, mapping of metal elements and EDX spectra of particles corresponding to the solid solutions SrZr1-xTixO3 and SrTi1-xZrxO3, obtained under alkaline hydrothermal conditions at 200 °C for 4 h, using a 5 M KOH solution, SrSO4 and different contents of Ti-gel (Ti(OH)4•4.5H2O), a) 15.0, b) 30.0 and c) 50.0 %mol Ti.
